# Supplementary material for: Influence of molecular weight and concentration of carboxymethyl chitosan on biomimetic mineralization of collagen
Source: Royal Society of Chemistry journal article supplement (doi:10.1039/d0ra00999g), 2020-01-01
Supplement: d0ra00999g1.pdf [file d0ra00999g1.pdf]

Electronic Supplementary Information

**Influence of Molecular Weight and Concentration of Carboxymethyl Chitosan  
on Biomimetic Mineralization of Collagen**

Ruoxun Wang,<sup>‡a</sup> Jiaxin Guo,<sup>‡a</sup> Xiaoxuan Lin,<sup>a</sup> Sipeng Chen<sup>a</sup> and Sui Mai<sup>\*a</sup>

<sup>a</sup> Department of Operative Dentistry and Endodontics, Guanghua School of Stomatology, Hospital of Stomatology, Sun Yat-sen University, Guangzhou, China; Guangdong Provincial Key Laboratory of Stomatology, Guangzhou, China. E-mail: maisui@mail.sysu.edu.cn

<sup>‡</sup> These authors contributed equally to this work.

**Fourier transform infrared spectroscopy (FT-IR) analysis of CMC**

**Methods:** FT-IR analysis of CMC of three different MWs (RuibioC3105, MW 20 kDa, Germany; RuibioC3108, MW 60 kDa, Germany; RuibioC3125, MW 150 kDa, Germany) was performed by an FT-IR spectrometer (Nicolet 6700-Contiium, Thermo Scientific, Waltham, MA, USA). Each spectrum was the result of signal-averaging of 32 scans at a resolution of 2 cm<sup>-1</sup> and the wavenumber ranged from 400 to 4000 cm<sup>-1</sup>.

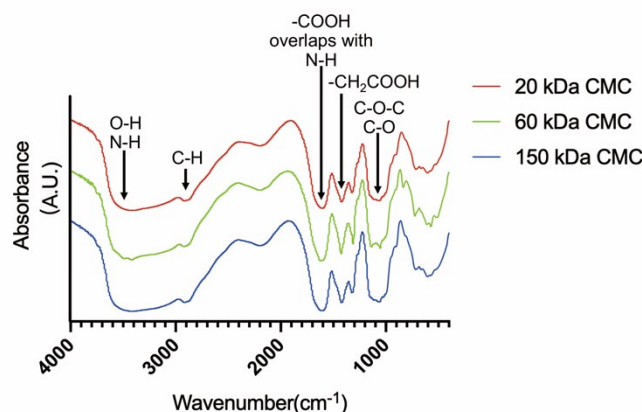

**Fig. S1** FT-IR spectra of CMC of three different MWs. Basic characteristic peaks at 1597-1650 cm<sup>-1</sup> (-COOH group overlaps with N-H bend), 1414-1401 cm<sup>-1</sup> (-CH<sub>2</sub>COOH group), 3455-3445 cm<sup>-1</sup> (O-H and N-H stretch), 2923-2867 cm<sup>-1</sup> (C-H stretch) and 1154-1029 cm<sup>-1</sup> (C-O and C-O-C stretch) are labelled<sup>1,2</sup>.

## <sup>1</sup>H-Nuclear magnetic resonance (NMR) analysis of CMC

**Methods:** Proton spectra of CMC of three different MWs were obtained using an NMR spectrometer (Bruker Avance III, Bruker BioSpin, Switzerland) operating at a frequency of 500 MHz under the normal conditions. Samples were prepared by dissolving in deuterium oxide (D<sub>2</sub>O). Chemical shifts were referenced using tetramethylsilane as internal standard. Degrees of substitution (DS) of different carboxymethyl groups were determined based on the <sup>1</sup>H NMR signal areas<sup>3, 4</sup>.

**Results:** The proton NMR spectra of CMC of three different MWs showed chemical shifts at 3.2-3.5 ppm and 4.2-4.5 ppm (Fig. S2), which could be assigned to monocarboxymethyl substitution on amino and hydroxyl groups respectively<sup>1, 3</sup>. The resonance signals of the protons from N, N-dicarboxymethyl groups could be found at around 3.9 ppm<sup>1, 5</sup>, which were larger than those of monocarboxymethylation in all the spectra. DS of N, N-dicarboxymethyl groups of CMC of three different MWs were close to 100%, while DS of O-carboxymethyl groups were approximately 62%, 40% and 52% respectively. DS of N-carboxymethyl groups were not determined here due to small signals overlapping with those of protons from chitosan.

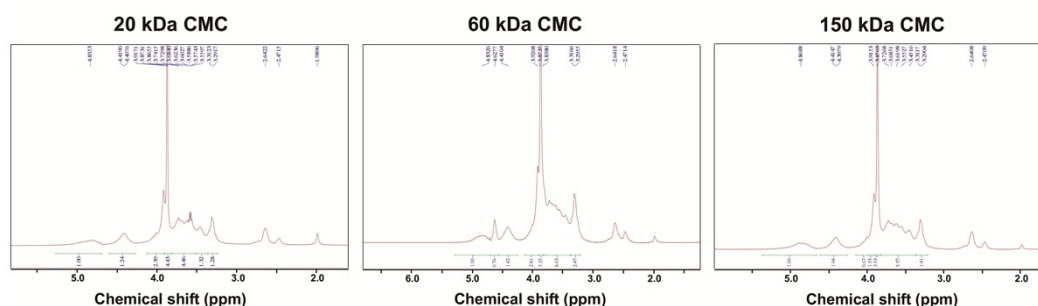

**Fig. S2** Proton NMR spectra of CMC of three different MWs.

## References

- 1 N. Inamdar, V. K. Mourya and A. Tiwari, *Adv Mater Lett*, 2010, **1**, 11-33.
- 2 X. Fei Liu, Y. Lin Guan, D. Zhi Yang, Z. Li and K. De Yao, *J Appl Polym Sci*, 2001, **79**, 1324-1335.

**3** R. J. N. Hjerde, K. M. Vårum, H. Grasdalen, S. Tokura and O. Smidsrød, *Carbohydr Polym*, 1997, **34**, 131-139.

**4** Y. Kurita and A. Isogai, *Int J Biol Macromol*, 2012, **50**, 741-746.

**5** R. A. A. Muzzarelli, P. Ilari and M. Petrarulo, *Int J Biol Macromol*, 1994, **16**, 177-180.
